# Supplementary material
Source: publisher figshare collection journal article supplement (https://acs.figshare.com/ndownloader/files/4677667)
Supplement: Supplementary file 1 [file 4677667]

# Supporting Information

for

## Current and Historical Deposition of PBDEs, Pesticides, PCBs, and PAHs to Rocky Mountain National Park, USA

*SASCHA USENKO,<sup>†</sup> DIXON H. LANDERS,<sup>§</sup> PETER G. APPLEBY,<sup>⊥</sup>*

*AND STACI L. SIMONICH<sup>\*,†,‡</sup>*

<sup>†</sup>Department of Chemistry, <sup>‡</sup>Department of Environmental and Molecular Toxicology, Oregon State  
University, Corvallis, Oregon 97331-7301

<sup>§</sup>United States Environmental Protection Agency-Western Ecology Division, Corvallis, OR 97330, USA

<sup>⊥</sup>Environmental Radioactivity Research Centre, University of Liverpool<sup>‡</sup>, Liverpool L69 3BX, UK

---

<sup>†</sup> Department of Chemistry

<sup>‡</sup> Department of Environmental and Molecular Toxicology

<sup>§</sup> United States Environmental Protection Agency-Western Ecology Division, Corvallis, OR 97330,  
USA

<sup>⊥</sup>Environmental Radioactivity Research Centre, University of Liverpool<sup>‡</sup>, Liverpool L69 3BX, UK

\* Corresponding author phone: +541-737-9194; fax: +541-737-0497; e-mail: Staci.Simonich@orst.edu

## Chemicals.

All semi-volatile organic compound (SOC) standards were acquired from the EPA repository or purchased from Chem Services Inc. (West Chester, PA), Restek (Bellefonte, PA), Sigma-Aldrich Corp. (St. Louis, MO), or AccuStandard (New Haven, CT). Standard Reference Material (SRM) #1941b was acquired from the National Institute of standards and Technology (NIST) (Gaithersburg, MD). Solvents were Fisher Scientific (Fairlawn, NJ) Optima grade and the anhydrous sodium sulfate was Mallinckrodt Baker (Phillipsburg, NJ) pesticide grade. Isotopically labeled standards were purchased from CDN Isotopes (Pointe-Claire, Quebec, Canada) or Cambridge Isotope Labs (Andover, MA). The isotopically-labeled recovery surrogates were *d*<sub>10</sub>-fluorene, *d*<sub>10</sub>-phenanthrene, *d*<sub>10</sub>-pyrene, *d*<sub>12</sub>-triphenylene, *d*<sub>12</sub>-benzo[a]pyrene, *d*<sub>12</sub>-benzo[ghi]perylene, *d*<sub>14</sub>-EPTC, *d*<sub>5</sub>-atrazine, *d*<sub>10</sub>-diazinon, *d*<sub>7</sub>-malathion, *d*<sub>10</sub>-parathion, *d*<sub>8</sub>-p,p'-DDE, *d*<sub>8</sub>-p,p'-DDT, *d*<sub>6</sub>-methyl parathion, *d*<sub>13</sub>-alachlor, *d*<sub>11</sub>-acetochlor, <sup>13</sup>C<sub>12</sub>-PCB 101 (2,2',4,5,5'-pentachlorobiphenyl), <sup>13</sup>C<sub>12</sub>-PCB 180 (2,2', 3,4,4',5,5'-heptachlorobiphenyl), *d*<sub>10</sub>-chlorpyrifos, <sup>13</sup>C<sub>6</sub>-HCB, *d*<sub>6</sub>-γ-HCH, *d*<sub>4</sub>-endosulfan I, *d*<sub>4</sub>-endosulfan II, *d*<sub>14</sub>-trifluralin, <sup>13</sup>C<sub>12</sub>-BDE 28 (2,4,4'-tribromodiphenyl ether), <sup>13</sup>C<sub>12</sub>-BDE 47 (2,2',4,4'-tetrabromodiphenyl ether), <sup>13</sup>C<sub>12</sub>-BDE 99 (2,2',4,4',5-tetrabromodiphenyl ether), <sup>13</sup>C<sub>12</sub>-BDE 100 (2,2',4,4',6-tetrabromodiphenyl ether), <sup>13</sup>C<sub>12</sub>-BDE 118 (2,3',4,4',5-tetrabromodiphenyl ether), <sup>13</sup>C<sub>12</sub>-BDE 138 (2,2',3,4,4',5'-tetrabromodiphenyl ether), <sup>13</sup>C<sub>12</sub>-BDE 153 (2,2',4,4',5,5'-tetrabromodiphenyl ether), and <sup>13</sup>C<sub>12</sub>-BDE 183 (2,2',3,4,4',5',6-tetrabromodiphenyl ether). The isotopically-labeled internal standards were *d*<sub>10</sub>-acenaphthene, *d*<sub>12</sub>-benzo[k]fluoranthene, *d*<sub>10</sub>-fluoranthene, and <sup>13</sup>C<sub>12</sub>-PCB 138 (2,2',3,4,4',5'-hexachlorobiphenyl). All standards were stored at 4°C and remade, as needed, to insure stability. The organophosphate standards were stored separately from other chemical classes in ethyl acetate (EA) to minimize degradation.

## Sample Collection.

Sediment cores were collected from the deepest point in the lake during the ice-free summer season using a pontoon raft equipped with an Uwitec gravity corer with an 86 mm internal diameter. Vertically-planed sediment cores (25-50 cm in depth), with an intact surface layer, were sectioned in the field with a clean stainless steel blade. The first 10 cm of each core was sectioned into 0.5 cm increments (12-18 g wet wt increment) and the remainder of the core was sectioned into 1.0 cm increments (30-40 g wet wt increment). Each sediment slice was stored in a 250 mL solvent rinsed glass jar. A pre-baked piece of aluminum foil was placed over the mouth of the jar to separate the sample from the cap. Sediment samples were shipped overnight in ~50-L coolers with cold packs to the laboratory where they were stored at 4 °C for physical and elemental analysis.

## Physical and Elemental Analysis.

Aliquots of the freeze-dried sediment were used for the analyses of total carbon (TC), total organic carbon (TOC),  $^{210}\text{Pb}$ ,  $^{137}\text{Cs}$ ,  $^{226}\text{Ra}$ , and  $^{241}\text{Am}$ . Destructive carbon analysis (TC and TOC) was preformed using flash combustion and a Carlo Erba 1108A CN analyzer. Carbonate was removed, using HCl fumes for 18hrs, prior to combustion for TOC analysis. Freeze-dried sediment sample aliquots were analyzed for  $^{210}\text{Pb}$ ,  $^{226}\text{Ra}$ ,  $^{137}\text{Cs}$ , and  $^{241}\text{Am}$  by direct gamma assay at the Liverpool University Environmental Radioactivity Laboratory, using an Ortec HPGe GWL series well-type coaxial low background intrinsic germanium detector (*I*). Radiodating of  $^{210}\text{Pb}$  and  $^{226}\text{Ra}$  was determined by the gamma emissions at 46.5 keV and 295 keV, respectively.  $^{137}\text{Cs}$  and  $^{241}\text{Am}$  were measured by their emissions at 662 keV and 59.5 keV, respectively.

### **SOC Extraction and Isolation.**

Samples were allowed to thaw in sealed grass jars in the dark for ~15 minutes and were ground with sodium sulfate (1:15 ratio), that had been baked at 400 °C for 3 hrs and cooled, to remove excess water. The sample was packed into three or four 66-mL Accelerated Solvent Extractor (ASE) cells (Dionex, Sunnyvale, CA) with each cell containing ~80 g of the sediment/sodium sulfate mixture. Once in the ASE cells, 15  $\mu\text{L}$  of 10 ng/ $\mu\text{L}$  isotopically labeled surrogate-ethyl acetate (EA) solution was distributed equally among the tops of the cells containing sample. The sample was extracted using an ASE 300 and dichloromethane (DCM) (100 °C, 1500 psi, 3 cycles of 3 minutes, 150% flush volume).

The sediment extract was concentrated to 0.5 mL in the TurboVap II (Zymark, Hopkinton, MA) with nitrogen and solvent exchanged to hexane. Polar matrix interferences were removed using a 20-g silica solid phase extraction (SPE) cartridge (Varian). Analytes were eluted from the silica SPE using 100 mL DCM:EA. The eluate was then concentrated and solvent exchanged to DCM. Elemental sulfur and the high molecular weight interferences were removed using a Waters Gel Permeation Chromatography Cleanup System (Milford, MA) as previously described (2). The target fraction was concentrated to 0.3 mL under a gentle stream of nitrogen and spiked with 15  $\mu\text{L}$  of 10 ng/ $\mu\text{L}$  isotopically labeled internal standard-EA solution just prior to gas chromatographic mass spectrometry (GC/MS) injection.

Sodium sulfate was used as the laboratory blank and was carried through the entire analytical method (extraction, cleanup, and concentrating), starting at the grinding step, the laboratory blank was spiked with the same quantity of isotopically labeled surrogate and internal standards as mention above. The minimum SOC concentrations in samples to the laboratory blank was of 3:1.

### **Quantification and Validation.**

Quantification was preformed with a surrogate standard calibration curve (4-12 points) and SOC concentrations were calculated relative to surrogates. Sample-specific estimated method detection limits (EDLs), calculated using EPA-method 8280A (3), were determined for all target SOC. A

representative sediment sample (0.5-1.0 cm) (not spiked with target analytes) from Waldo Lake was used to calculate EDLs, which ranged from 0.1-200 ng/g dry wt, depending on the SOC (Table S1). The analytical method was validated for efficiency with triplicate spike and recovery experiments using Waldo Lake sediment. These recoveries were corrected for background SOC concentrations in sediment and represent the efficiency of the entire analytical method because the target SOCs were spiked prior to extraction and the isotopically-labeled surrogates were spiked just prior to analysis. Background SOC concentrations measured in Waldo Lake sediment ranges from 0.0 to 5.0% of the spike concentration, expect for phenanthrene which was approximately 40%. The accuracy and precision of the analytical method were determined using NIST SRM 1941b.

#### **PRISM.**

The Parameter-elevation Regressions on Independent Slopes Model (PRISM) was designed to estimate the orographic climate parameters (4). PRISM provides 2×2 km resolution monthly annual precipitation estimates from 1895 to February 2007. PRISM also provides the average precipitation for a month from 1971-2000 with 800×800 m resolution.

#### **Analysis and Quality Control.**

The sediment extracts were analyzed for target SOCs by GC/MS, using both electron impact (EI) ionization and electron capture negative ionization (ECNI) with selective ion monitoring as described in detail by Usenko et al (2) and Ackerman et al (5). Target SOCs were quantified using the mode of ionization that resulted in the lowest instrumental detection limits (IDLs) (2). IDLs ranged from 0.063-6.7 pg/μL for GC/EI-MS and from 0.006-1.1 pg/μL for GC/ECNI-MS. Target SOCs were identified using the following criteria; GC retention time ( $\pm 0.05$  min of standard), quantification and confirmation ion ratios ( $\pm 20\%$  of standard), and a signal-to-noise ratio of 10:1. SOC concentrations in sediment were surrogate recovery (concentration calculated relative to surrogate) and laboratory blank corrected. All WACAP quality assurance objectives were meet (6).

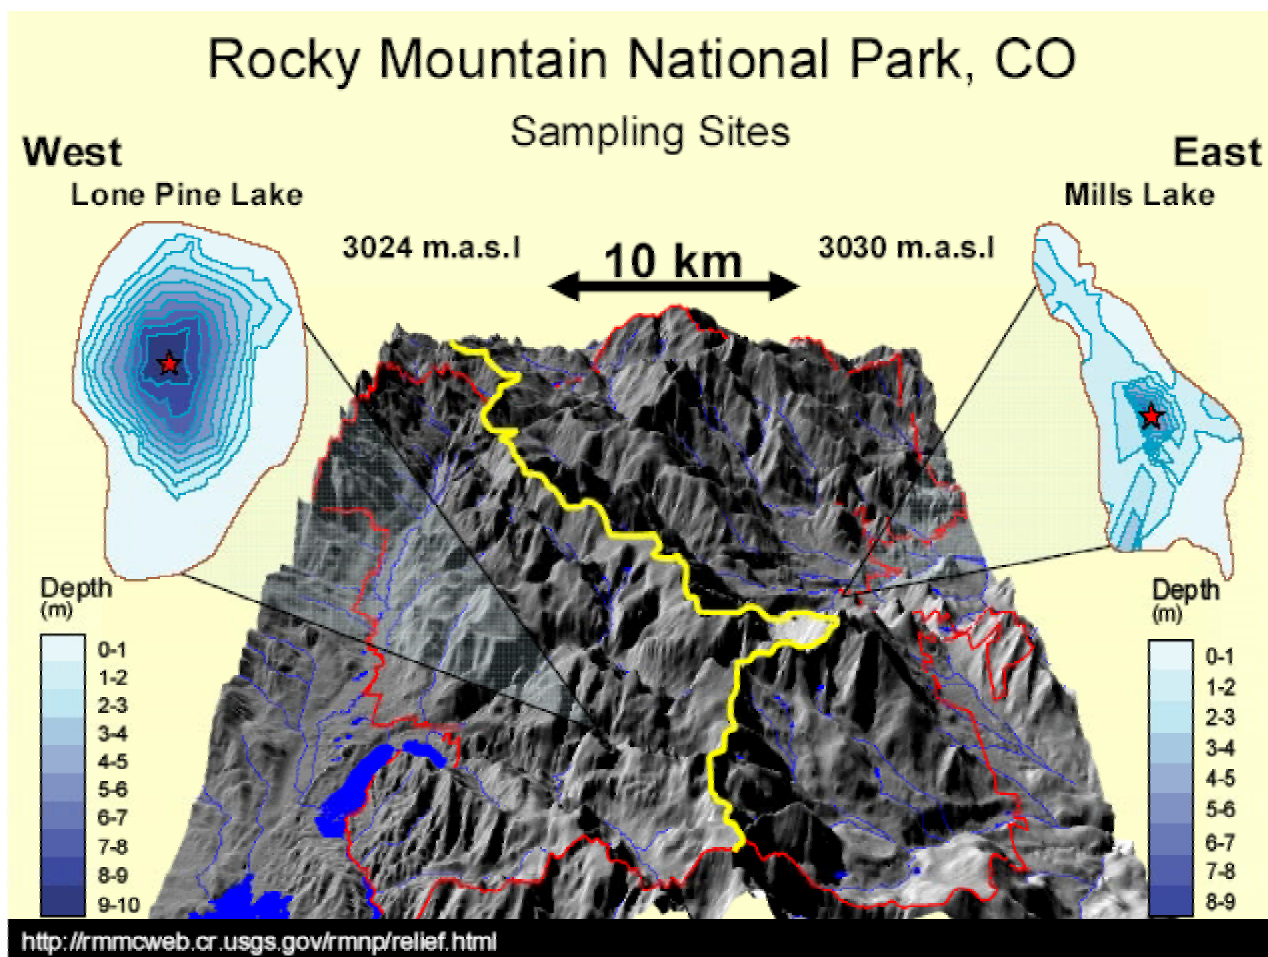

**Figure S1. Shaded relief map of Rocky Mountain National Park with lake bathymetry maps for Lone Pine Lake and Mills Lake. Red line represents the park boundary and the yellow line represents the Continental Divide ~ 4150 m.a.s.l. between the two catchments. Stars indicate coring site location within lake.**

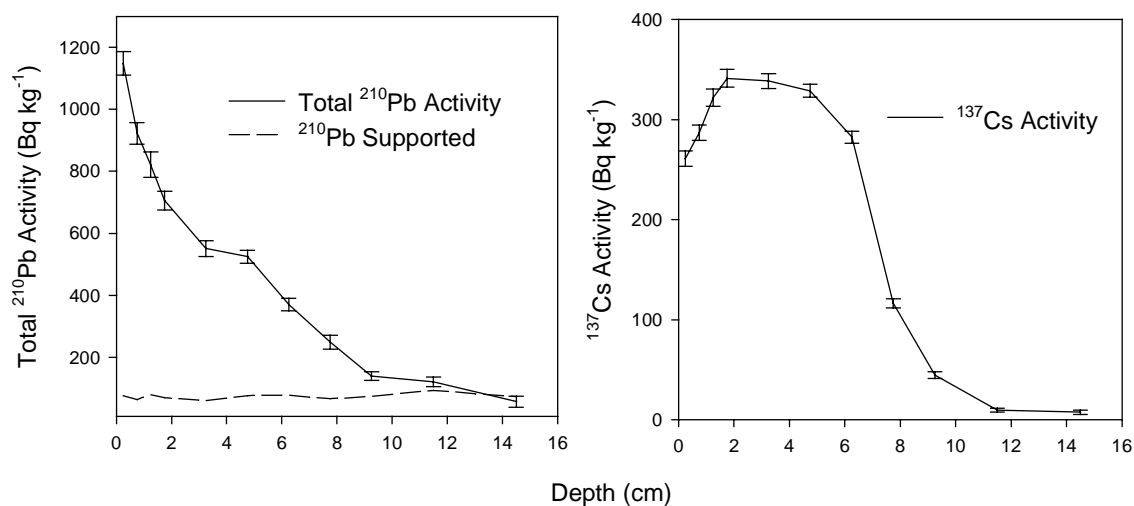

**Figure S2. Fallout radionuclides in Lone Pine Lake (a) total and supported  $^{210}\text{Pb}$  activity, (b)  $^{137}\text{Cs}$  concentrations versus depth.**

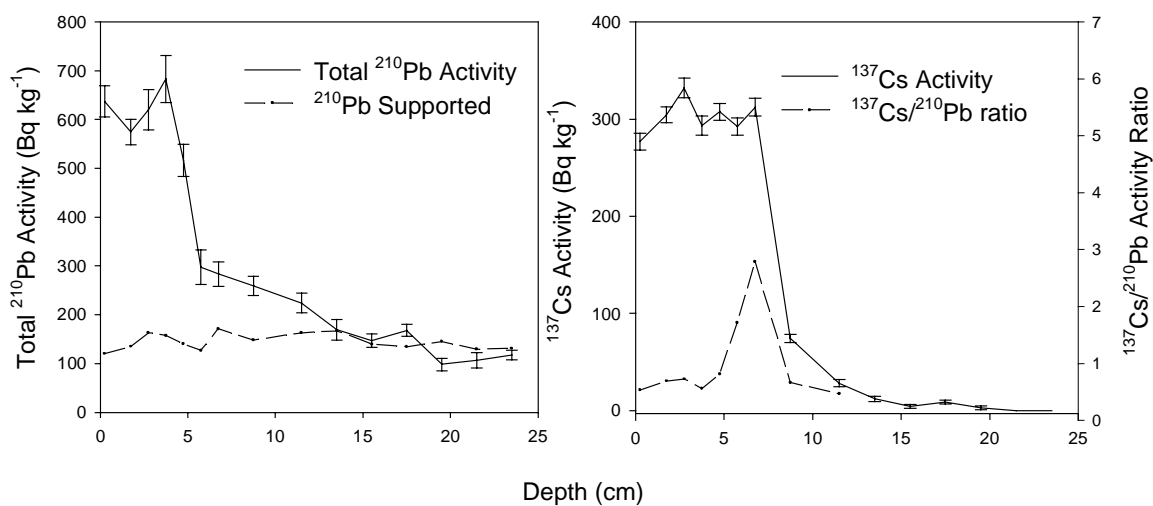

**Figure S3. Fallout radionuclides in Mills Lake core (a) total and supported  $^{210}\text{Pb}$  activity, (b)  $^{137}\text{Cs}$  concentrations and  $^{137}\text{Cs}/^{210}\text{Pb}$  activity ratios versus depth.**

1 **Table S1. Recovery of target SOC's in sediment over the entire analytical method.**

|                                                          | Waldo Lake <sup>a</sup> |       | EDL <sup>b</sup> |         | SRM1941b        |       | Waldo Lake <sup>a</sup>       |       | EDL <sup>b</sup> |         | SRM1941b        |       |
|----------------------------------------------------------|-------------------------|-------|------------------|---------|-----------------|-------|-------------------------------|-------|------------------|---------|-----------------|-------|
|                                                          | Avg. % Rec              | % RSD | ng/g dw          | ng/g dw | PD <sup>c</sup> | % RSD | Avg. %Rec                     | %RSD  | ng/g dw          | ng/g dw | PD <sup>c</sup> | % RSD |
| <b>Amide Pesticides</b>                                  |                         |       |                  |         |                 |       |                               |       |                  |         |                 |       |
| Propachlor                                               | 49.8                    | 3.3   | 7.8              |         |                 |       | Acetochlor                    | 46.1  | 9.3              | 9.3     |                 |       |
| Alachlor                                                 | 53.1                    | 12.2  | 13.3             |         |                 |       | Metolachlor                   | 58.6  | 12.2             | 14.2    |                 |       |
| <b>Organochlorine Pesticides and Metabolites</b>         |                         |       |                  |         |                 |       |                               |       |                  |         |                 |       |
| HCH, gamma <sup>d</sup>                                  | 29.6                    | 9.4   | 118              |         |                 |       | Chlordane, cis                | 45.7  | 14.7             | 18.4    | 0.7             | 10.0  |
| HCH, alpha <sup>d</sup>                                  | 50.8                    | 9.0   | 133              |         |                 |       | p,p'-DDD <sup>f</sup>         | 60.3  | 10.2             | 16.5    | 5.1             | 0.0   |
| HCH, beta <sup>d</sup>                                   | 36.2                    | 9.1   | 176              |         |                 |       | Nonachlor, trans              | 46.8  | 17.2             | 3.7     | 0.1             | 53.2  |
| HCH, delta <sup>d</sup>                                  | 51.8                    | 9.4   | 59.5             |         |                 |       | o,p'-DDD <sup>f</sup>         | 55.6  | 10.8             | 4.3     | 1.1             |       |
| Methoxychlor                                             | 67.4                    | 14.8  | 18.6             | 1.0     |                 |       | Chlordane, trans              | 46.8  | 15.2             | 2.0     | 0.4             | 5.8   |
| Heptachlor epoxide                                       | 46.8                    | 13.8  | 89.4             |         |                 |       | Nonachlor, cis                | 53.6  | 13.0             | 1.5     | 0.1             | 55.4  |
| Endrin aldehyde                                          | 51.8                    | 7.9   | 19.6             |         |                 |       | Aldrin                        | 29.0  | 12.5             | 83.2    |                 |       |
| Endrin                                                   | 70.4                    | 11.5  | 205              |         |                 |       | o,p'-DDT <sup>g</sup>         | 44.4  | 12.0             | 23.6    |                 |       |
| Heptachlor                                               | 32.5                    | 12.4  | 111.9            |         |                 |       | p,p'-DDE <sup>h</sup>         | 55.9  | 12.7             | 3.4     | 3.1             | 0.0   |
| o,p'-DDE <sup>h</sup>                                    | 57.7                    | 11.2  | 11.3             |         |                 |       | Mirex                         | 56.3  | 6.3              | 41.4    |                 |       |
| Chlordane, oxy                                           | 43.7                    | 14.8  | 12.2             |         |                 |       | p,p'-DDT <sup>g</sup>         | 54.7  | 13.5             | 37.9    |                 |       |
| Dieldrin                                                 | 74.0                    | 13.1  | 115              | 0.32    |                 |       |                               |       |                  |         |                 |       |
| <b>Organochlorine Sulfide Pesticides and Metabolites</b> |                         |       |                  |         |                 |       |                               |       |                  |         |                 |       |
| Endosulfan sulfate                                       | 61.4                    | 9.6   | 4.4              |         |                 |       | Endosulfan II                 | 58.5  | 10.3             | 9.0     |                 |       |
| Endosulfan I                                             | 50.2                    | 13.2  | 8.1              |         |                 |       |                               |       |                  |         |                 |       |
| <b>Phosphorothioate Pesticides</b>                       |                         |       |                  |         |                 |       |                               |       |                  |         |                 |       |
| Methyl parathion                                         | 49.9                    | 5.1   | 33.0             |         |                 |       | Parathion                     | 54.0  | 6.5              | 15.7    |                 |       |
| Malathion                                                | 48.3                    | 7.9   | 65.8             |         |                 |       | Ethion                        | 60.0  | 10.4             | 10.8    |                 |       |
| Diazinon                                                 | 47.9                    | 5.4   | 5.1              |         |                 |       | Chlorpyrifos                  | 45.3  | 9.7              | 1.2     |                 |       |
| <b>Triazine Herbicides and Metabolites</b>               |                         |       |                  |         |                 |       |                               |       |                  |         |                 |       |
| Simazine                                                 | 63.2                    | 3.4   | 58.3             |         |                 |       | Atrazine                      | 57.6  | 6.3              | 9.5     |                 |       |
| Cyanazine                                                | 136                     | 19.3  | 171              |         |                 |       |                               |       |                  |         |                 |       |
| <b>Miscellaneous Pesticides</b>                          |                         |       |                  |         |                 |       |                               |       |                  |         |                 |       |
| Metribuzin                                               | 43.6                    | 20.6  | 30.0             |         |                 |       | Dacthal                       | 55.5  | 11.5             | 6.4     |                 |       |
| Etridiazole                                              | 21.6                    | 13.9  | 29.1             |         |                 |       | Trifluralin                   | 32.9  | 10.8             | 1.7     |                 |       |
| Triallate                                                | 41.1                    | 8.6   | 24.2             |         |                 |       | Hexachlorobenzene             | 33.5  | 8.0              | 1.0     | 7.6             | 24.1  |
| <b>Polycyclic Aromatic Hydrocarbons</b>                  |                         |       |                  |         |                 |       |                               |       |                  |         |                 |       |
| Acenaphthylene (ACY)                                     | 20.9                    | 14.7  | 13.3             | 139     |                 |       | Retene                        | 59.2  | 6.8              | 9.66    |                 |       |
| Acenaphthene (ACE)                                       | 33.5                    | 13.5  | 11.2             | 51.6    |                 |       | Benzo[k]fluoranthene (BkF)    | 68.5  | 10.0             | 3.3     | 206             | 0.6   |
| Fluorene (FLO)                                           | 25.5                    | 12.7  | 7.2              | 59.2    | 12.7            | 22.3  | Benzo[a]pyrene (BaP)          | 46.7  | 9.3              | 2.1     | 221             | 33.6  |
| Anthracene (ANT)                                         | 34.8                    | 8.0   | 24.6             | 163     | 1.5             | 13.6  | Benzo[b]fluoranthene (BbF)    | 64.8  | 9.5              | 4.0     | 468             | 0.0   |
| Phenanthrene (PHE)                                       | 26.0                    | 20.0  | 13.0             | 383     | 0.0             | 18.6  | Indeno[1,2,3-cd]pyrene (IcdP) | 60.1  | 9.5              | 29.0    | 240             | 12.9  |
| Pyrene (PYR)                                             | 50.6                    | 5.7   | 1.0              | 403     | 24.0            | 22.1  | Dibenzo[a,h]anthracene (DahA) | 58.2  | 9.8              | 23.7    | 76.4            | 25.3  |
| Fluoranthene (FLA)                                       | 50.5                    | 5.1   | 1.1              | 443     | 24.3            | 20.8  | Benzo[e]pyrene (BeP)          | 64.6  | 9.1              | 6.5     | 285             | 4.5   |
| Chrysene/Triphenylene (CT)                               | 59.9                    | 9.2   | 0.8              | 171     | 48.1            | 22.3  | Benzo[ghi]perylene (BghiP)    | 55.0  | 11.1             | 5.1     | 227             | 11.3  |
| Benzo[a]anthracene (BaA)                                 | 64.5                    | 10.2  | 11.4             | 250     | 17.8            | 17.2  |                               |       |                  |         |                 | 22.0  |
| <b>Polychlorinated Biphenyls</b>                         |                         |       |                  |         |                 |       |                               |       |                  |         |                 |       |
| PCB 101                                                  | 70.7                    | 14.2  | 129              | 4.1     | 13.2            | 29.9  | PCB 118                       | 74.2  | 11.6             | 10.2    | 3.3             | 17.2  |
| PCB 138                                                  | 74.9                    | 11.7  | 9.7              | 4.3     | 12.3            | 30.4  | PCB 187                       | 76.1  | 13.1             | 3.9     | 2.0             | 0.0   |
| PCB 153                                                  | 73.2                    | 11.8  | 3.5              | 4.0     | 21.6            | 20.1  | PCB 183                       | 76.5  | 13.1             | 3.7     | 0.7             | 23.0  |
| <b>Polybrominated Diphenyl Ethers</b>                    |                         |       |                  |         |                 |       |                               |       |                  |         |                 |       |
| BDE 7                                                    | 58.6                    | 3.0   | 0.2              |         |                 |       | BDE 85/155                    | 73.0  | 2.0              | 1.8     |                 |       |
| BDE 8                                                    | 77.8                    | 2.2   | 0.1              |         |                 |       | BDE 99                        | 75.5  | 2.4              | 27.2    | 0.56            |       |
| BDE 10                                                   | 42.7                    | 6.9   | 0.2              |         |                 |       | BDE 100                       | 74.1  | 2.3              | 9.4     | 0.85            |       |
| BDE 17                                                   | 78.1                    | 3.6   | 0.4              |         |                 |       | BDE 116                       | 72.8  | 3.2              | 1.8     |                 |       |
| BDE 25                                                   | 83.3                    | 3.3   | 0.8              |         |                 |       | BDE 118                       | 76.5  | 4.8              | 15.1    |                 |       |
| BDE 28                                                   | 70.5                    | 4.7   | 4.1              |         |                 |       | BDE 119                       | 75.0  | 2.9              | 3.3     |                 |       |
| BDE 30                                                   | 70.6                    | 3.9   | 0.6              |         |                 |       | BDE 126                       | 69.2  | 1.7              | 2.1     |                 |       |
| BDE 32                                                   | 77.2                    | 1.7   | 0.7              |         |                 |       | BDE 138                       | 76.0  | 1.2              | 3.3     |                 |       |
| BDE 35                                                   | 82.6                    | 3.2   | 0.7              |         |                 |       | BDE 153                       | 76.7  | 1.3              | 26.0    |                 |       |
| BDE 37                                                   | 80.3                    | 4.0   | 1.3              |         |                 |       | BDE 154                       | 84.8  | 0.8              | 0.9     |                 |       |
| BDE 49                                                   | 69.4                    | 5.4   | 1.3              |         |                 |       | BDE 155                       | 101.6 | 0.9              | 15.6    |                 |       |
| BDE 47                                                   | 71.9                    | 4.5   | 15.6             | 1.3     |                 |       | BDE 166                       | 72.4  | 2.0              | 2.8     |                 |       |
| BDE 66                                                   | 75.2                    | 5.1   | 0.6              |         |                 |       | BDE 181                       | 99.9  | 2.3              | 5.8     |                 |       |
| BDE 71                                                   | 67.7                    | 4.8   | 1.3              |         |                 |       | BDE 183                       | 73.3  | 2.3              | 31.3    |                 |       |
| BDE 75                                                   | 70.0                    | 5.4   | 4.9              |         |                 |       | BDE 190                       | 104.4 | 2.1              | 5.7     |                 |       |
| BDE 77                                                   | 70.5                    | 6.1   | 0.8              |         |                 |       |                               |       |                  |         |                 |       |
| 97.0                                                     |                         |       |                  |         |                 |       |                               |       |                  |         |                 |       |
| <b>Averages, % RSD, and PD<sup>c</sup></b>               |                         |       |                  |         |                 |       |                               |       |                  |         |                 |       |
| average                                                  | 60.3                    | 8.5   | 23.7             | 109     | 16.8            | 23.6  | max                           | 136   | 20.6             | 205     | 468             | 55.4  |
|                                                          |                         |       |                  |         |                 |       | min                           | 20.9  | 0.8              | 0.1     | 0.1             | 0.0   |

<sup>a</sup>Recoveries validated at 26 ng/g wet wt and were corrected for background concentrations of SOC's in sediment. <sup>b</sup>Sample-specific estimated method detection limits. <sup>c</sup>Percent Difference from SRM 1941b certified values n=5. <sup>d</sup>Hexachlorocyclohexane. <sup>e</sup>Dichlorodiphenyldichloroethylene. <sup>f</sup>Dichlorodiphenyldichloroethane. <sup>g</sup>Dichlorodiphenyltrichloroethane.

**Table S2. Physical and Chemical Limnological Characteristics of Mills Lake and Lone Pine Lake.**  
**\* indicate data from the parameter-elevation regressions on independent slopes model (average annual total precipitation from 1971-2000, 800×800 m).**

| Rocky Mountain National Park                   |                |              |                 |
|------------------------------------------------|----------------|--------------|-----------------|
|                                                | Lone Pine Lake | Mills Lake   | Mills/Lone Pine |
| Catchment Characteristics                      |                |              |                 |
| Latitude (dd)                                  | 40.22          | 40.29        | 1.00            |
| Longitude (dd)                                 | 105.73         | 105.64       | 1.00            |
| Elevation (masl)                               | 3024           | 3030         | 1.00            |
| Lake Volume (m <sup>3</sup> )                  | 128325         | 78251        | 0.61            |
| Lake Surface Area (m <sup>2</sup> )            | 49134.9        | 61148        | 1.24            |
| Catchment Area (m <sup>2</sup> )               | 21144492       | 15093297     | 0.71            |
| Hydraulic Residence Time (d)                   | 4.3            | 3.3          | 0.77            |
| *Average Annual Precipitation (cm)             | 97.6           | 107.1        | 1.10            |
| *Average Annual Max Temp (°C)                  | 7.7            | 7.4          | 0.96            |
| Focusing Factor                                | 1.87           | 1.48         | 0.79            |
| Limnological Characteristics (2003)            |                |              |                 |
| Primary Productivity                           | Oligotrophic   | Oligotrophic |                 |
| Dissolved Organic Carbon (mg·L <sup>-1</sup> ) | 1.73           | 1.55         | 0.90            |
| Total Nitrogen (mg·L <sup>-1</sup> )           | 0.17           | 0.38         | 2.24            |
| Total Phosphorus (μg·L <sup>-1</sup> )         | 2.7            | 2.8          | 1.04            |
| Chlorophyll a (μg·L <sup>-1</sup> )            | 2.0            | 2.1          | 1.05            |
| Turbidity (NTU)                                | 0.3            | 0.6          | 2.00            |
| Specific Conductivity (μS·cm <sup>-1</sup> )   | 14.0           | 11.9         | 0.85            |
| pH                                             | 6.67           | 6.05         | 0.91            |



1 **Table S3. Focus-corrected concentrations and fluxes in sediment from Lone Pine Lake (west) and**  
2 **Mills Lake (east) sediment cores. \* indicate below method detection limit and nm indicates no**  
3 **measurement was preformed.**

| Lone Pine Lake<br>Date | <b>ΣEndosulfan</b>    |                                    | <b>Dacthal</b>        |                                    | <b>ΣDDEs + ΣDDDs</b>  |                                    | <b>ΣChlordane</b>     |                                    |
|------------------------|-----------------------|------------------------------------|-----------------------|------------------------------------|-----------------------|------------------------------------|-----------------------|------------------------------------|
|                        | Conc.(FF)             | Flux (FF)                          |
|                        | ng g <sup>-1</sup> dw | ng m <sup>-2</sup> y <sup>-1</sup> | ng g <sup>-1</sup> dw | ng m <sup>-2</sup> y <sup>-1</sup> | ng g <sup>-1</sup> dw | ng m <sup>-2</sup> y <sup>-1</sup> | ng g <sup>-1</sup> dw | ng m <sup>-2</sup> y <sup>-1</sup> |
| 2003                   | 0.57                  | 86                                 | 0.034                 | 5.1                                | 2.2                   | 340                                | 0.13                  | 20                                 |
| 1997.5                 | 0.42                  | 67                                 | 0.024                 | 3.8                                | 2.5                   | 400                                | 0.13                  | 22                                 |
| 1990                   | 0.47                  | 80                                 | 0.029                 | 4.9                                | 4.4                   | 750                                | 0.18                  | 32                                 |
| 1986                   | 0.24                  | 41                                 | 0.025                 | 4.3                                | 3.2                   | 550                                | 0.15                  | 26                                 |
| 1982                   | 0.34                  | 57                                 | 0.021                 | 3.6                                | 5.2                   | 870                                | 0.20                  | 33                                 |
| 1972.5                 | 0.19                  | 29                                 | 0.025                 | 3.7                                | 4.9                   | 730                                | 0.16                  | 24                                 |
| 1967                   | 0.20                  | 31                                 | 0.029                 | 4.4                                | 5.5                   | 820                                | 0.18                  | 26                                 |
| 1961                   | 0.15                  | 21                                 | 0.022                 | 3.1                                | 5.1                   | 710                                | 0.14                  | 19                                 |
| 1955                   | 0.11                  | 15                                 | 0.030                 | 4.0                                | 4.6                   | 590                                | 0.13                  | 17                                 |
| 1949                   | 0.093                 | 12                                 | *                     | *                                  | 7.2                   | 940                                | 0.11                  | 14                                 |
| 1936                   | 0.051                 | 6.1                                | *                     | *                                  | 5.6                   | 670                                | 0.08                  | 9.4                                |
| 1920                   | *                     | *                                  | *                     | *                                  | 3.3                   | 400                                | 0.03                  | 4.1                                |
| 1870                   | *                     | *                                  | *                     | *                                  | *                     | *                                  | *                     | *                                  |

| Mills Lake<br>Date |       |     |       |     |     |      |      |     |
|--------------------|-------|-----|-------|-----|-----|------|------|-----|
| 2004               | 1.7   | 500 | 0.068 | 20  | 7.0 | 2100 | 0.38 | 110 |
| 2000               | 1.2   | 360 | 0.065 | 19  | 6.5 | 2000 | 0.32 | 95  |
| 1996               | 1.2   | 340 | 0.030 | 8.6 | 6.3 | 1800 | 0.40 | 110 |
| 1990.5             | 1.3   | 310 | 0.042 | 10  | 10  | 2400 | 0.43 | 110 |
| 1987.5             | 0.85  | 170 | 0.041 | 8.1 | 7.0 | 1401 | 0.34 | 67  |
| 1974               | 0.79  | 150 | 0.047 | 8.8 | 9.8 | 1880 | 0.36 | 68  |
| 1970               | 0.38  | 90  | 0.035 | 8.4 | 7.1 | 1600 | 0.27 | 63  |
| 1963.5             | 0.24  | 77  | 0.018 | 5.9 | 10  | 3300 | 0.24 | 77  |
| 1953.5             | 0.073 | 23  | *     | *   | 8.6 | 2700 | 0.12 | 36  |
| 1947               | 0.045 | 11  | *     | *   | 4.1 | 1000 | 0.04 | 11  |
| 1938               | 0.040 | 8.7 | *     | *   | 1.8 | 410  | 0.02 | 3.7 |
| 1905               | *     | *   | *     | *   | *   | *    | *    | *   |

| Lone Pine Lake<br>Date | <b>Dieldrin</b>       |                                    | <b>ΣPAHs</b>          |                                    | <b>ΣPCBs</b>          |                                    | <b>ΣPBDEs</b>         |                                    |
|------------------------|-----------------------|------------------------------------|-----------------------|------------------------------------|-----------------------|------------------------------------|-----------------------|------------------------------------|
|                        | Conc.(FF)             | Flux (FF)                          |
|                        | ng g <sup>-1</sup> dw | ng m <sup>-2</sup> y <sup>-1</sup> | ng g <sup>-1</sup> dw | ng m <sup>-2</sup> y <sup>-1</sup> | ng g <sup>-1</sup> dw | ng m <sup>-2</sup> y <sup>-1</sup> | ng g <sup>-1</sup> dw | ng m <sup>-2</sup> y <sup>-1</sup> |
| 2003                   | 0.12                  | 19                                 | 85                    | 13000                              | 0.19                  | 28                                 | 1.2                   | 160                                |
| 1997.5                 | 0.064                 | 10                                 | 80                    | 13000                              | 0.22                  | 36                                 | 0.45                  | 59                                 |
| 1990                   | 0.075                 | 12                                 | 99                    | 17000                              | 0.31                  | 53                                 | nm                    | nm                                 |
| 1986                   | 0.052                 | 8.9                                | 90                    | 16000                              | 0.24                  | 41                                 | nm                    | nm                                 |
| 1982                   | 0.070                 | 12                                 | 130                   | 21000                              | 0.27                  | 46                                 | 1.7                   | 250                                |
| 1972.5                 | 0.050                 | 7.5                                | 170                   | 25000                              | 0.24                  | 35                                 | nm                    | nm                                 |
| 1967                   | 0.086                 | 13                                 | 190                   | 29000                              | 0.28                  | 41                                 | nm                    | nm                                 |
| 1961                   | *                     | *                                  | 170                   | 24000                              | 0.24                  | 33                                 | *                     | *                                  |
| 1955                   | *                     | *                                  | 150                   | 19000                              | 0.089                 | 11                                 | nm                    | nm                                 |
| 1949                   | *                     | *                                  | 280                   | 37000                              | 0.22                  | 29                                 | nm                    | nm                                 |
| 1936                   | *                     | *                                  | 210                   | 25000                              | 0.17                  | 20                                 | *                     | *                                  |
| 1920                   | *                     | *                                  | 210                   | 25000                              | 0.061                 | 7.3                                | *                     | *                                  |
| 1870                   | *                     | *                                  | 40                    | 4800                               | *                     | *                                  | *                     | *                                  |

| Mills Lake<br>Date |       |    |     |       |       |     |      |      |
|--------------------|-------|----|-----|-------|-------|-----|------|------|
| 2004               | 0.23  | 66 | 180 | 52000 | 0.74  | 210 | 9.6  | 2900 |
| 2000               | 0.10  | 30 | 190 | 56000 | 0.47  | 140 | 4.9  | 1400 |
| 1996               | 0.059 | 17 | 150 | 41000 | 0.50  | 140 | nm   | nm   |
| 1990.5             | 0.18  | 43 | 160 | 37000 | 0.49  | 120 | 2.4  | 560  |
| 1987.5             | 0.088 | 18 | 170 | 33000 | 0.41  | 81  | nm   | nm   |
| 1974               | 0.095 | 17 | 210 | 40000 | 0.60  | 110 | 0.30 | 57   |
| 1970               | 0.061 | 15 | 160 | 37000 | 0.40  | 97  | *    | *    |
| 1963.5             | *     | *  | 180 | 58000 | 0.37  | 120 | nm   | nm   |
| 1953.5             | *     | *  | 140 | 42000 | 0.10  | 30  | nm   | nm   |
| 1947               | *     | *  | 180 | 45000 | 0.064 | 16  | *    | *    |
| 1938               | *     | *  | 240 | 52000 | 0.027 | 5.9 | nm   | nm   |
| 1905               | *     | *  | 31  | 6900  | 0.050 | 11  | *    | *    |

**Table S4. Statistically significant ( $p < 0.05$ ) doubling times and half-lives of current and historic use SOC<sub>s</sub> in Mills Lake and Lone Pine Lake sediment cores. Half-lives and doubling times were calculated from the natural log focus-corrected flux vs. year and the standard deviation was estimated from the slope of the linear regression. Linear regressions were calculated from the time of U.S. introduction to U.S. restriction and/or U.S. restriction to 2003. ns indicates the linear regression was not statistically significant ( $p > 0.05$ ). <sup>a</sup> reference (7), <sup>b</sup> reference (8), and <sup>c</sup> reference (9).**

|                       | Current-use SOC <sub>s</sub> |             |             |                                                      | Historic-use SOC <sub>s</sub> |                                       |                         |
|-----------------------|------------------------------|-------------|-------------|------------------------------------------------------|-------------------------------|---------------------------------------|-------------------------|
|                       | ΣEndosulfans                 | Dacthal     | ΣPAHs       | ΣPBDEs                                               | ΣChlordane                    | ΣDDD <sub>s</sub> + ΣDDE <sub>s</sub> | ΣPCBs                   |
| Mills Lake            |                              |             |             |                                                      |                               |                                       |                         |
| Doubling Time         | 12.8 ± 0.005                 | 30.7 ± 0.02 | 22.6 ± 0.01 | 5.4 ± 0.001                                          | 10.9 ± 0.02                   | ns                                    | 8.3 ± 0.01, 13.6 ± 0.01 |
| Half-life             | ns                           | ns          | ns          | ns                                                   | ns                            | ns                                    | ns                      |
| Lone Pine Lake        |                              |             |             |                                                      |                               |                                       |                         |
| Doubling Time         | 19.1 ± 0.004                 | ns          | ns          | ns                                                   | 27.5 ± 0.01                   | 46.3 ± 0.01                           | ns                      |
| Half-life             | ns                           | ns          | 28.3 ± 0.01 | ns                                                   | 28.5 ± 0.01                   | 16.0 ± 0.01                           | ns                      |
| Great Lakes           |                              |             |             |                                                      |                               |                                       |                         |
| Doubling Time         |                              |             |             | 17 <sup>a</sup> , 11 <sup>b</sup> , 6.4 <sup>b</sup> |                               |                                       |                         |
| Half-life             |                              |             |             |                                                      |                               |                                       |                         |
| Lakes across the U.S. |                              |             |             |                                                      |                               |                                       |                         |
| Half-life             |                              |             |             |                                                      |                               | 14.9 <sup>c</sup>                     | 19.7 <sup>c</sup>       |

**Table S5. Selected SOC ratios (Mills Lake/Lone Pine Lake) in snow (concentrations, flux, and load), lake water (concentrations), and paired sediment intervals (focus-corrected flux). \* indicates where a significant difference ( $p < 0.05$ ) exists between Lone Pine Lake and Mills Lake, nd indicates a non detect, and nm indicates not measured in snow. \*\* indicates data from the parameter-elevation regressions on independent slopes model (1971-2003, 2×2 km).**

| SOC <sub>s</sub>                      | Snow          |              |              | Lake Water | Sediment Ratio   |                  |                  |                  |                  |
|---------------------------------------|---------------|--------------|--------------|------------|------------------|------------------|------------------|------------------|------------------|
|                                       | 2003<br>Conc. | 2003<br>Flux | 2003<br>Load |            | 2003 ± 1<br>Flux | 1990 ± 1<br>Flux | 1987 ± 1<br>Flux | 1974 ± 1<br>Flux | 1954 ± 1<br>Flux |
| ΣEndosulfan                           | 1.4*          | 3.2*         | 2.3*         | 4.0*       | 6.4*             | 4.1*             | 3.2*             | 5.2*             | 1.5*             |
| Dacthal                               | 1.1           | 2.5*         | 1.8*         | 1.5*       | 3.8*             | 2.0*             | 1.9*             | 2.4*             | nd               |
| ΣDDE <sub>s</sub> + ΣDDD <sub>s</sub> | nd            | nd           | nd           | nd         | 6.1*             | 3.2*             | 2.5*             | 2.5*             | 4.5*             |
| Trans-Chlordane                       | 1.3           | 3.0*         | 2.1*         | nd         | 6.0*             | 3.2*             | 2.3*             | 2.4*             | 2.7*             |
| Dieldrin                              | 1.6*          | 4.3*         | 3.1*         | nd         | 3.5*             | 3.4*             | 2.0*             | 2.3*             | nd               |
| ΣPAH <sub>s</sub>                     | 0.95          | 2.2*         | 1.6*         | nd         | 4.1*             | 2.2*             | 2.1*             | 1.6*             | 2.2*             |
| ΣPCBs                                 | nd            | nd           | nd           | nd         | 6.5*             | 2.2              | 2.0              | 3.2*             | 2.6*             |
| ΣPBDE <sub>s</sub>                    | nm            | nm           | nm           | nm         | 24*              | 3.1*             | nd               | nd               | nd               |
| Precipitation**                       |               |              |              |            |                  |                  |                  |                  |                  |
| April-Sept. (Summer)                  |               |              |              |            | 0.90             | 1.0              | 0.97             | 1.0              | 0.96             |
| Oct-March (Winter)                    |               |              |              |            | 1.1              | 0.97             | 1.0              | 0.95             | 0.91             |
| Annual                                |               |              |              |            | 1.1              | 1.0              | 0.96             | 0.94             | 0.92             |
| %TOC                                  |               |              |              |            | 1.1              | 1.3              | 1.2              | 1.1              | 1.0              |

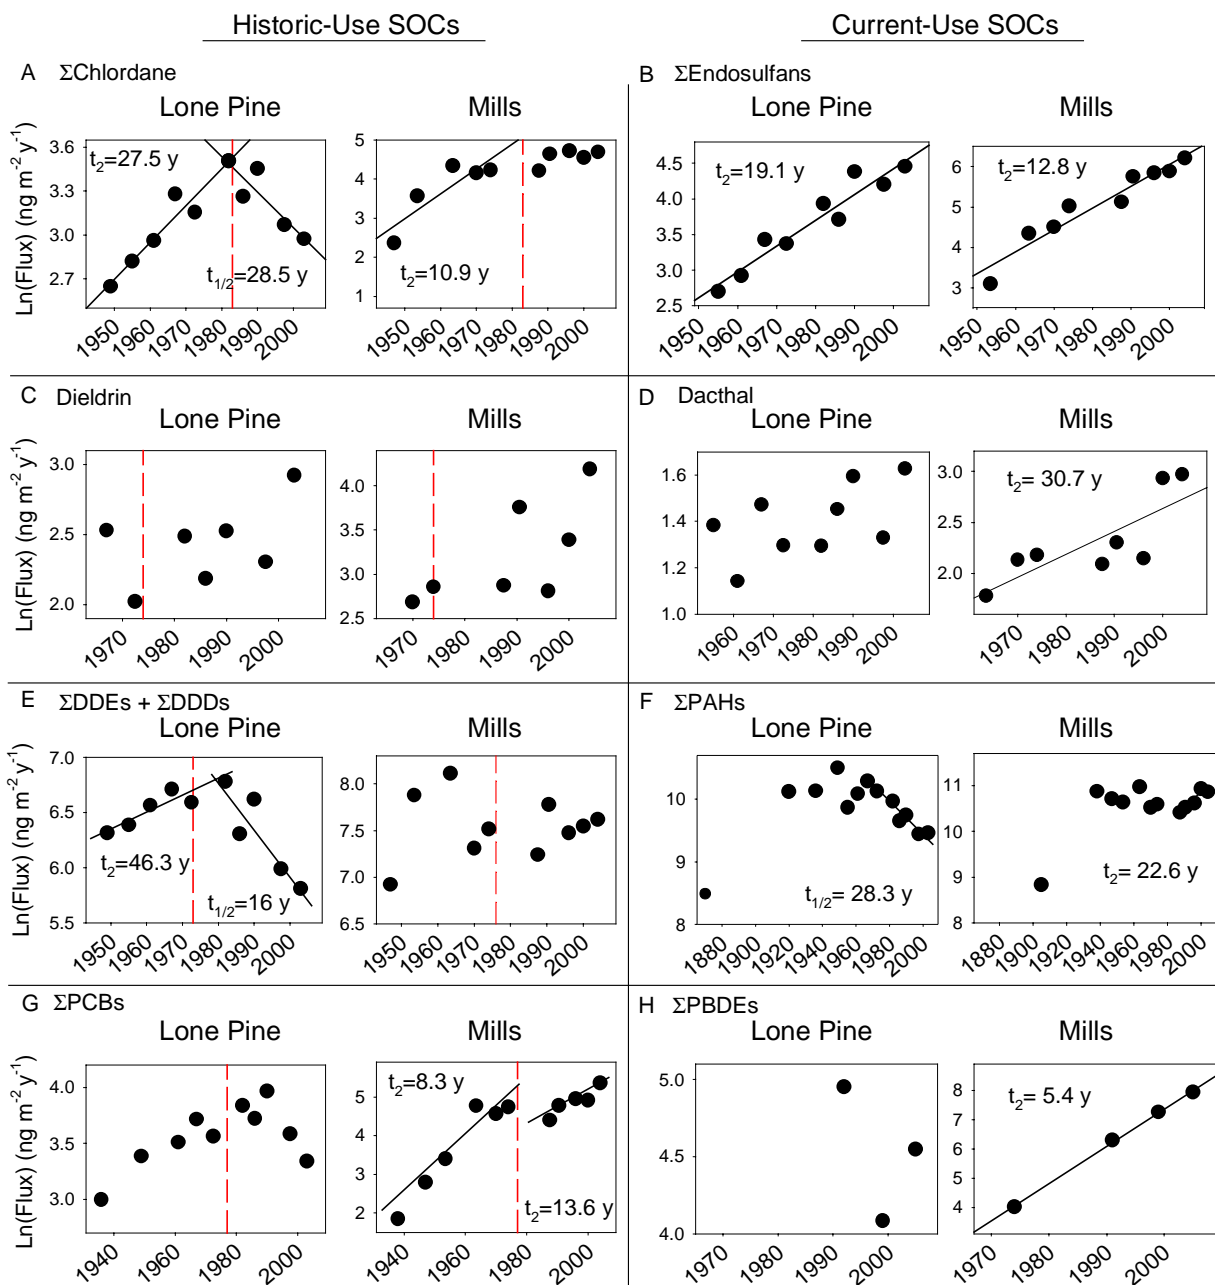

**Figure S4. Natural log focus-corrected flux ( $\text{ng m}^{-2} \text{y}^{-1}$ ) profiles of current and historic-use SOCs in Lone Pine Lake (west) and Mills Lake (east) sediment cores. Doubling times ( $t_2$ ) and half-lives ( $t_{1/2}$ ) are given where linear regression lines are statistically significant ( $p < 0.05$ ). Dashed lines (—) indicate U.S. restriction date.  $\Sigma\text{Chlordane}$  represents the sum of TC, TN, and CN. Plots start at U.S. registration year. Linear regressions were calculated from the time of U.S. introduction to U.S. restriction and/or U.S. restriction to 2003.**

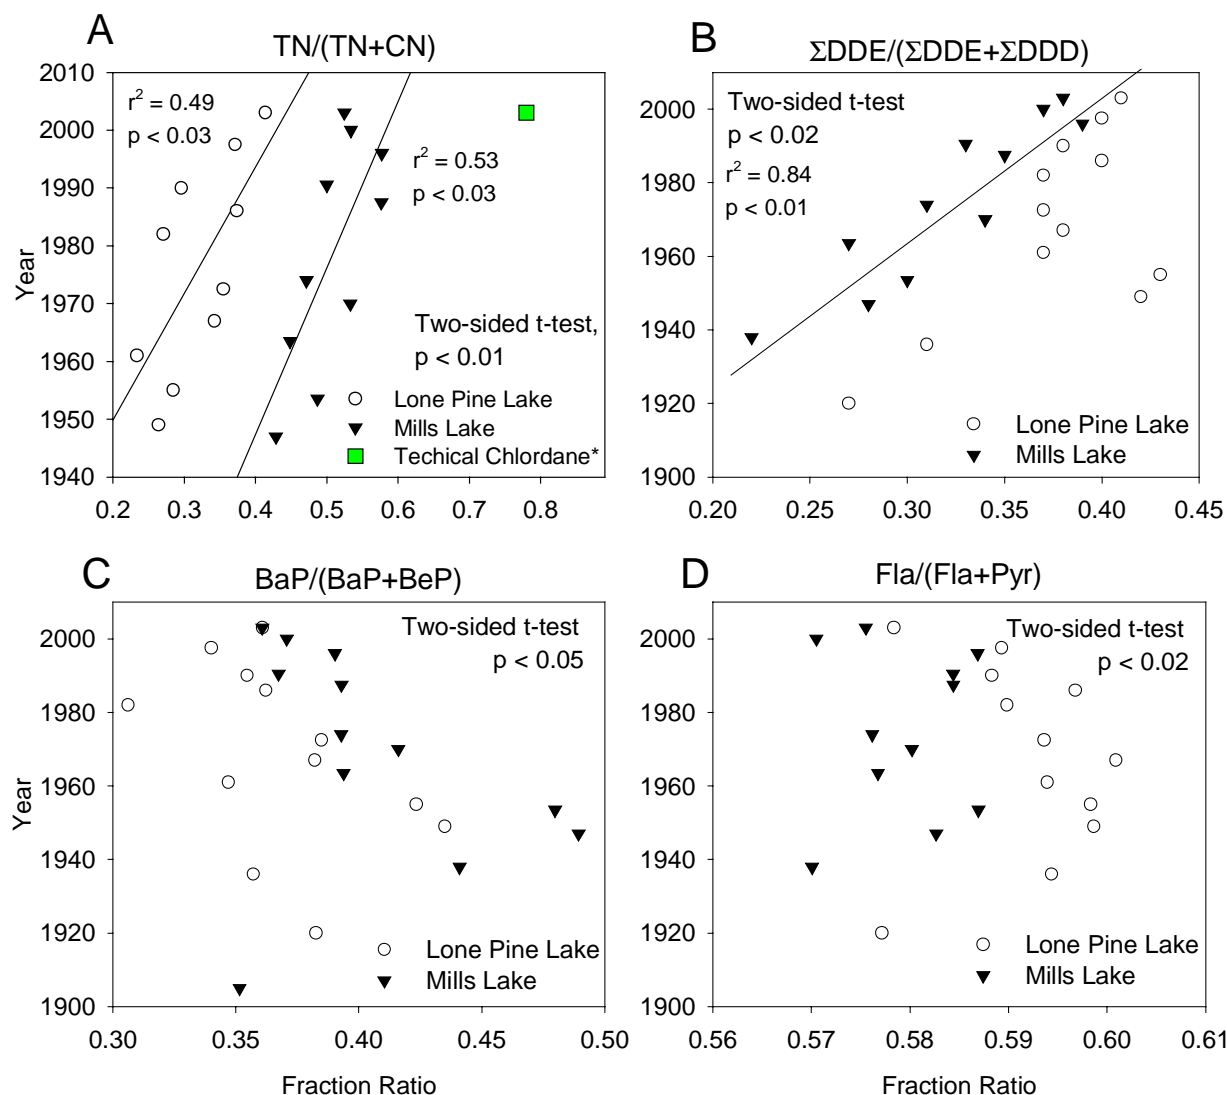

**Figure S5. The ratio of TN/(TN+CN),  $\Sigma$ DDE/( $\Sigma$ DDE+ $\Sigma$ DDD), BaP/(BaP+BeP), and FLA/(FLA+PYR) in sediment from Mills Lake and Lone Pine Lake. Only linear regressions that were statistical significant ( $p < 0.05$ ) are shown. Ratios of contaminants were significantly different between the lakes. \* reference (10).**

#### Reference:

- (1) Appleby, P. G.; Nolan, P. J.; Gifford, D. W.; Godfrey, M. J.; Oldfield, F.; Anderson, N. J.; Battarbee, R. W. <sup>210</sup>Pb Dating by low background gamma counting. *Hydrobiologia* **1986**, *141*, 21-27.
- (2) Usenko, S.; Hageman, K. J.; Schmedding, D. W.; Wilson, G. R.; Simonich, S. L. *Trace Analysis of Semi-Volatile Organic Compounds in Large Volume Samples of Snow, Lake Water, and Groundwater. Environ. Sci. Technol.* **2005**, *39*, 6006-6015.
- (3) Method-8280A, E. P. A. *The analysis of polychlorinated dibenzo-p-dioxins and polychlorinated dibenzofurans by high resolution gas chromatography/low resolution mass spectrometry (HRGC/LRMS).* <http://www.epa.gov/epaoswer/hazwaste/test/pdfs/8280a.pdf>.
- (4) Daly, C.; Neilson, R. P.; Phillips, D. L. A statistical-topographic model for mapping climatological precipitation over mountainous terrain. *Journal of Applied Meteorology* **1994**, *33*, 140-158.
- (5) Ackerman, L. K.; Wilson, G. R.; Simonich, S. L. *Quantitative Analysis of 39 Polybrominated Diphenyl Ethers by Isotope Dilution GC/Low-Resolution MS. Anal. Chem.* **2005**, *77*, 1979-1987.

- (6) Landers, D. H.; Simonich, S. L.; Campbell, D. H.; Erway, M. M.; Geiser, L.; Jaffe, D.; Kent, M.; Schreck, C.; Blett, T.; Taylor, H. E. *Western Airborne Contaminants Assessment Project Research Plan*. **2003**, *Western Airborne Contaminants Assessment Project Research Plan*. EPA/600/R-03/035. U.S. EPA, ORD, NHEERL, WED, Corvallis, OR([www2.nature.nps.gov/air/Studies/air\\_toxics/wacap.htm](http://www2.nature.nps.gov/air/Studies/air_toxics/wacap.htm)).
- (7) Li, A.; Rockne, K. J.; Sturchio, N.; Song, W. L.; Ford, J. C.; Buckley, D. R.; Mills, W. J. *Polybrominated diphenyl ethers in the sediments of the Great Lakes. 4. Influencing factors, trends, and implications*. *Environ. Sci. Technol.* **2006**, *40*, 7528-7534.
- (8) Zhu, L. Y.; Hites, R. A. *Brominated Flame Retardants in Sediment Cores from Lake Michigan and Erie*. *Environ. Sci. Technol.* **2005**, *39*, 3488-3494.
- (9) Van Metre, P. C.; Mahler, B. J. *Trends in Hydrophobic Organic Contaminants in Urban and Reference Lake Sediments across the United States, 1970-2001*. *Environ. Sci. Technol.* **2005**, *39*, 5567-5574.
- (10) Dearth, M. A.; Hites, R. A. *Complete Analysis of Technical Chlordane Using Negative Ionization Mass Spectrometry*. *Environ. Sci. Technol.* **1991**, *25*, 245-254.
